# Supplementary material for: Exercise-based rehabilitation for major non-communicable diseases in low-resource settings: a scoping review
Source: PubMed Central journal article supplement — BMJ Glob Health. 2019 Nov 7;4(6):e001833. doi: 10.1136/bmjgh-2019-001833 (PMC6861093; doi:10.1136/bmjgh-2019-001833), 2019-11-07
Supplement: bmjgh-2019-001833supp001.pdf [file bmjgh-2019-001833supp001.pdf]

## Supplementary file 1: Search strategy (MEDLINE)

Database: Ovid MEDLINE(R) ALL <1946 to October 12, 2018>

---

- 1 exp Cardiovascular Diseases/
- 2 exp Neoplasms/
- 3 exp Lung Diseases, Obstructive/
- 4 exp Diabetes Mellitus/
- 5 (heart or cardio\* or chronic respirat\* or coronary or pulmonary or lung or vascular).tw,kw.
- 6 (angina\* or myocardial infarc\* or ischaemia\* or carditis\* or atherosclero\*).tw,kw.
- 7 (cerebrovascular adj2 (accident\* or apoplexy)).tw,kw.
- 8 (diabet\* or aneurysm\* or cancer\* or neoplasm\* or asthma\* or COPD or stroke).tw,kw.
- 9 or/1-8
- 10 Cardiac Rehabilitation/
- 11 exp Exercise/
- 12 exp Exercise Movement Techniques/
- 13 exp Exercise Therapy/
- 14 (physical\* adj2 activ\*).tw,kw.
- 15 (exercis\* or gym\* or walk\*).tw,kw.
- 16 or/10-15
- 17 rehab\*.tw,kw.
- 18 exp Nutrition Therapy/
- 19 Patient Education as Topic/
- 20 exp Behavior Therapy/
- 21 ((behavior\* or behaviour\*) adj3 (modif\* or chang\* or therap\*)).tw,kw.
- 22 ((patient\* or health\* or session\*) adj2 educat\*).tw,kw.
- 23 ((physical\* or physio\* or occupational\* or diet\* or nutrition\*) adj2 therap\*).tw,kw.
- 24 (physiotherap\* or kinesiology).tw,kw.
- 25 ((diet\* or motivat\* or health\* or educ\* or behav\*) adj3 counsel\*).tw,kw.
- 26 or/17-25
- 27 16 and 26
- 28 9 and 27
- 29 african continental ancestry group/
- 30 american native continental ancestry group/

- 31 oceanic ancestry group/
- 32 (Aborigin\* or Afghan\* or Armenia\* or Bangladesh\* or Basutoland or Basuto\* or Benin\* or Bhutan\* or Bolivia\* or "Burkina Faso" or Burma or Burmes\* or Burundi\* or Cabo Verde\* or Cambodia\* or Cameroon\* or Cape Verde\* or "Central African Republic" or Central America\* or Ceylon or Chad\* or Comoro Islands or Comoros or Comorian\* or Congo\* or "Cote d'Ivoire" or Djibouti\* or Egypt\* or El Salvador\* or Eritrea\* or Ethiopia\* or "French Somaliland" or Gambia\* or Gaza\* or Georgia\* or Ghana\* or "Gold Coast" or Guatemala\* or Guinea\* or Guinea-Bissau\* or Haiti\* or Honduras or Honduran\* or "Ifni" or India\* or indigenous or Indonesia\* or Ivory Coast or Kenya\* or Kirghizia\* or Kirghiz or Kyrgyz or Kirgizstan\* or Kiribati or "Democratic People's Republic of Korea" or North Korea\* or Kosovo or Kyrgyzstan or "Kyrgyz Republic" or "Lao PDR" or Laos or Laotian\* or Latin America\* or Lesotho or Mosotho\* or Liberia\* or Madagascar or Malagasy or Malawi\* or Mali\* or Mauritania\* or Mayotte or Melanesia\* or Micronesia\* or Moldova or Moldavia\* or Morocco or Moroccan\* or Mozambique or Mozambican\* or Myanmar\* or Nepal\* or New Caledonia\* or Nicaragua\* or Niger\* or Nigeria\* or Nyasaland or Pakistan\* or Papua New Guinea or Philippines or Filipinas or Filipino\* or Philippines or Phillipines or Phillippines or "Ruanda-Urundi" or Rwanda\* or Samoa\* or Sao Tome\* or "Samoan Islands" or Senegal\* or "Sierra Leone" or Sri Lanka\* or "Solomon Islands" or Somalia\* or Sudan\* or Swaziland or Swazi\* or Syria\* or Tadjikistan\* or Tadjik\* or Tadjikistan\* or Tajikistan\* or Tanzania\* or Timor-Leste or Togo\* or "Togolese Republic" or Uganda\* or Ukrain\* or "Upper Volta" or Urundi or Uzbek\* or Uzbekistan or Vanuatu or Ni-Vanuatu or "Viet Nam" or Vietnam\* or "West Bank" or Yemen\* or Zaire or Zambia\* or Zimbabwe\*).af.
- 33 or/29-32
- 34 Developing Countries/
- 35 Medically Underserved Area/
- 36 ((countr\* or nation\* or population\*) adj3 (poor\* or develop\* or less-develop\* or less develop\* or least-develop\* or least develop\* or third world or under-develop\* or under develop\*).tw,kw.
- 37 (income\* adj3 (low\* or middle\*).tw,kw.
- 38 (underserved or deprived or third world\*).tw,kw.
- 39 (resource\* adj3 (low\* or constrain\* or poor\* or limit\* or minimal\* or lack\* or scarc\*).tw,kw.
- 40 or/34-39
- 41 33 or 40
- 42 28 and 41
- 43 animals/ not (animals/ and humans/) (4469363)
- 44 42 not 43
- 45 exp clinical study/

46 comparative study/  
47 meta-analysis/  
48 random\*.af.  
49 ((clinical or control\*) adj3 trial\*).af.  
50 placebo.af.  
51 (cohort\* or case-control\* or case control\* or compar\* or multivariat\*).af.  
52 or/45-51  
53 44 and 52
