# Supplementary material for: Exercise-based rehabilitation for major non-communicable diseases in low-resource settings: a scoping review
Source: PubMed Central journal article supplement — BMJ Glob Health. 2019 Nov 7;4(6):e001833. doi: 10.1136/bmjgh-2019-001833 (PMC6861093; doi:10.1136/bmjgh-2019-001833), 2019-11-07
Supplement: bmjgh-2019-001833supp002.pdf [file bmjgh-2019-001833supp002.pdf]

## Supplemental file 2: Characteristics of included studies in alphabetical order

| Study                                   | World Bank<br>Income<br>Classification * | Country | Study design        | Disease<br>population<br>(ICD10 code) | N  | Delivery model<br>(context / key health<br>care professional<br>[HCP] involved)                                               | Exercise component                                                                    | Risk factor management                                                                                                              | Geographic<br>context <sup>†</sup> | Implicit and explicit<br>considerations with respect<br>to LRS                                                                                           |
|-----------------------------------------|------------------------------------------|---------|---------------------|---------------------------------------|----|-------------------------------------------------------------------------------------------------------------------------------|---------------------------------------------------------------------------------------|-------------------------------------------------------------------------------------------------------------------------------------|------------------------------------|----------------------------------------------------------------------------------------------------------------------------------------------------------|
| <b>Abdelhalem<br/>2018<sup>25</sup></b> | LM                                       | Egypt   | RCT                 | CVD (I25)                             | 40 | - Outpatient cardiac<br>rehabilitation clinic at<br>university hospital<br><br>- HCP not reported                             | High-intensity treadmill<br>exercise                                                  | - Education about<br>heart disease and importance<br>of risk factor modification<br><br>- Advice regarding home-based<br>activities | Metro (L)                          | - Patients who live in distant<br>rural areas or have no means<br>of transportation and cannot<br>participate regularly in the<br>program were excluded. |
| <b>Ajiboye 2015<sup>26</sup></b>        | LM                                       | Nigeria | RCT                 | CVD (I50)                             | 69 | - Physiotherapy<br>outpatient<br>department of<br>university teaching<br>hospital<br><br>- Researcher /<br>research assistant | Combined aerobic and<br>resistance training                                           | - Health talks on prevention of<br>complications, lifestyle<br>modification and<br>healthy living                                   | Metro (L)                          |                                                                                                                                                          |
| <b>Ali 2014<sup>27</sup></b>            | LM                                       | India   | Case/Control<br>(P) | Respiratory<br>(J44)                  | 30 | - Centre for<br>respiratory diseases<br><br>- HCP not reported                                                                | Three different types of<br>exercises: walking,<br>biking and resistance<br>exercises | - Self-management education<br>related to Chronic Obstructive<br>Respiratory Disease                                                | Metro (M)                          | - A short-term program was<br>chosen to obtain maximum<br>physiological benefits and                                                                     |

|                                |    |       |                  |           |    |                                                                        |                                                                                                                                        |                                                                                                                                                               |          |                                                                                                                                                                                                                                                             |
|--------------------------------|----|-------|------------------|-----------|----|------------------------------------------------------------------------|----------------------------------------------------------------------------------------------------------------------------------------|---------------------------------------------------------------------------------------------------------------------------------------------------------------|----------|-------------------------------------------------------------------------------------------------------------------------------------------------------------------------------------------------------------------------------------------------------------|
|                                |    |       |                  |           |    |                                                                        |                                                                                                                                        |                                                                                                                                                               |          | compliance in minimum number of sessions.<br><br>- Respiratory physicians (in India) largely unaware of benefits of add-on pulmonary rehabilitation.                                                                                                        |
| <b>Babu 2010</b> <sup>28</sup> | LM | India | Case/Control (R) | CVD (I25) | 30 | - Rural hospital<br><br>- HCP not reported                             | Inpatient low intensity, short duration, early mobilization; followed by unsupervised exercise program                                 | - Dietary advice<br><br>- Patient education<br><br>- Identification of red flags<br><br>- Risk factor modification<br><br>- Compliance with medical treatment | Rural    | - Limited technology has forced the authors to rely on vital signs (pulse and blood pressure), auscultation, and perceived exertion as indicators for stressful situations during exercise.                                                                 |
| <b>Babu 2011</b> <sup>29</sup> | LM | India | RCT              | CVD (I50) | 30 | - Inpatient clinic; followed by home-based<br><br>- Physical therapist | Inpatient physical therapy (including breathing exercises, range of motion, walking) followed by structured home-based walking program | - Education (exercise safety)                                                                                                                                 | Town (L) | - Cost-effective treatment options are needed in countries where patients pay out-of-pocket for health care.<br><br>- Barriers to this home-based program were assessed through a semi-structured interview on the patients who completed the rehab program |

|                                      |     |          |                    |                      |    |                                                                               |                                                                                                                                                                                               |                                                                                          |           |                                                                                                                                                                                                                                                                        |
|--------------------------------------|-----|----------|--------------------|----------------------|----|-------------------------------------------------------------------------------|-----------------------------------------------------------------------------------------------------------------------------------------------------------------------------------------------|------------------------------------------------------------------------------------------|-----------|------------------------------------------------------------------------------------------------------------------------------------------------------------------------------------------------------------------------------------------------------------------------|
|                                      |     |          |                    |                      |    |                                                                               |                                                                                                                                                                                               |                                                                                          |           | ((family) fear and concerns, lack of interest, lack of motivation).                                                                                                                                                                                                    |
| <b>Basri 2017<sup>30</sup></b>       | LM  | Pakistan | RCT                | Respiratory (J44)    | 60 | - Medical ward, Hospital<br>- Physiotherapist                                 | Respiratory muscle and breathing exercises                                                                                                                                                    | - Smoking cessation<br>- Lifestyle and diet modification                                 | Metro (M) |                                                                                                                                                                                                                                                                        |
| <b>Biswas 2017<sup>31</sup></b>      | LM  | India    | Case / Control (P) | Cancer (C91 - 97)    | 30 | - Medical college<br>- HCP not reported                                       | Active movement, flexibility and resistive exercises                                                                                                                                          | - Relaxation training<br>- Cognitive behavioural therapy                                 | Metro (L) |                                                                                                                                                                                                                                                                        |
| <b>Chakraborty 2007<sup>32</sup></b> | LM  | India    | Cohort (P)         | CVD (I25)            | 52 | - Department of Physical Medicine and Rehabilitation<br>- Rehabilitation team | A one-week inpatient acute rehabilitation program (including walking and specific exercise), followed by home-based, self-directed exercise. Resistance training was added 6-wk post-surgery. | - Diet counselling<br>- Smoking cessation<br>- Drug adherence<br>- Sexual rehabilitation | Metro (L) | - Lots of illustrations and sketches were used instead of lengthy texts to make it comprehensible to even the illiterate patients.<br>- Low-cost, home-based program designed to extend beyond urban boundaries.<br>- Family members asked to adopt lifestyle changes. |
| <b>Chi-Jane 2012<sup>33</sup></b>    | HIC | Taiwan   | RCT                | Diabetes (E11 / I10) | 50 | - Community-based district health centre<br>- Researcher,                     | Education in exercise and weight loss; exercise diary                                                                                                                                         | - Education (weight[loss])<br>- Education (knowledge)<br>- Education (nutrition)         | Rural     | - Study in a remote village in southwestern Taiwan with limited medical resources.                                                                                                                                                                                     |

|                                           |    |       |            |           |     |                                                                                                                                                                                     |                                                                                                                                                                      |                                                                                                                                                                                                                                                   |           |                                                                                                                                                                                                                                                                                                                                                                                                         |
|-------------------------------------------|----|-------|------------|-----------|-----|-------------------------------------------------------------------------------------------------------------------------------------------------------------------------------------|----------------------------------------------------------------------------------------------------------------------------------------------------------------------|---------------------------------------------------------------------------------------------------------------------------------------------------------------------------------------------------------------------------------------------------|-----------|---------------------------------------------------------------------------------------------------------------------------------------------------------------------------------------------------------------------------------------------------------------------------------------------------------------------------------------------------------------------------------------------------------|
|                                           |    |       |            |           |     | public health nurse,<br>physician, nutritionist<br>and exercise<br>physiologist                                                                                                     |                                                                                                                                                                      | - Education (behaviour)                                                                                                                                                                                                                           |           |                                                                                                                                                                                                                                                                                                                                                                                                         |
| <b>Chockalingam<br/>2016<sup>34</sup></b> | LM | India | Cohort (P) | CVD (I25) | 33  | - Cardiac wellness<br>institute<br><br>- multidisciplinary<br>team of healthcare<br>professionals<br>including a physician,<br>physiotherapist,<br>nutritionist and<br>psychologist | Active exercise<br>component including<br>treadmill walking,<br>recumbent cycling,<br>resistance exercises with<br>free weights and<br>TheraBand floor<br>exercises. | - Nutritional counselling<br><br>- Goal-setting to promote<br>behaviour modification<br><br>- Psychosocial counselling<br><br>- Education about risk factors,<br>adherence to treatment,<br>resuming<br>normal activities and self-<br>management | Metro (L) | - A home-based modified<br>program was offered to those<br>patients with >2hrs one way<br>travelling distance.<br><br>- Family members were<br>encouraged to attend the<br>education and counselling<br>sessions.<br><br>- Work-out sessions were<br>made safe for participants<br>wearing traditional clothing.<br><br>- Nutritional counselling was<br>adapted to local cooking and<br>eating habits. |
| <b>Chung 2018<sup>35</sup></b>            | UM | Peru  | Cohort (P) | CVD (I10) | 104 | - Health centre<br><br>- Trained nurses and<br>nutritionists                                                                                                                        | - Physical exercise<br>training                                                                                                                                      | - Health assessment<br><br>- Lifestyle education<br><br>- Nutrition education<br><br>- Self-care education                                                                                                                                        | Metro (L) | - Four targeted health centres<br>in deprived and poor areas of<br>Lima, Peru where large<br>influxes of migrants from rural                                                                                                                                                                                                                                                                            |

|                                  |     |       |                  |                   |     |                                                                                                            |                                                           |                                                                                                                           |                            |                                                                                                                             |
|----------------------------------|-----|-------|------------------|-------------------|-----|------------------------------------------------------------------------------------------------------------|-----------------------------------------------------------|---------------------------------------------------------------------------------------------------------------------------|----------------------------|-----------------------------------------------------------------------------------------------------------------------------|
|                                  |     |       |                  |                   |     |                                                                                                            |                                                           |                                                                                                                           |                            | areas have resulted in poorer access to health care services.                                                               |
| <b>Daabis 2017<sup>36</sup></b>  | LM  | Egypt | RCT              | Respiratory (J44) | 45  | - Inpatient chest department and home-based<br>- HCP not reported                                          | Treadmill training plus low-intensity resistance training | - Education in the form of self-management of the disease, nutrition and lifestyle changes                                | Metro (L)                  | - Early rehabilitation may provide a window of opportunity for patient education and increases the continuity of care.      |
| <b>Davis 2012<sup>37</sup></b>   | HIC | USA   | Cohort (P)       | Diabetes (E11)    | 247 | - Federally qualified health centres and home-based component<br>- Trained non-medical research assistants | Physical activity goal setting / action plan              | - Self-management guide covering diet, physical activity, blood glucose monitoring, medication adherence and insulin use. | Multicentre, mixed context | - Resource poor and rural community clinics<br>- Materials written in simple language to accommodate low level of literacy. |
| <b>Dehdari 2009<sup>38</sup></b> | LM  | Iran  | RCT              | CVD (I25)         | 110 | - Outpatient cardiac rehabilitation clinic<br>- HCP not reported                                           | Exercise training (as part of usual care)                 | - Education<br>- Progressive muscular relaxation training (intervention)                                                  | Metro (L)                  |                                                                                                                             |
| <b>Dhameja 2013<sup>39</sup></b> | LM  | India | Case/Control (P) | CVD (I10)         | 60  | - Cardiopulmonary laboratory<br>- Yoga expert                                                              | Yoga-based postures and (breathing) exercises             | - Dietary advice                                                                                                          | Metro (L)                  |                                                                                                                             |

|                                       |    |       |            |           |     |                                                                            |                                                                                                                                         |                                                                                                                         |           |  |
|---------------------------------------|----|-------|------------|-----------|-----|----------------------------------------------------------------------------|-----------------------------------------------------------------------------------------------------------------------------------------|-------------------------------------------------------------------------------------------------------------------------|-----------|--|
| <b>Edla 2016<sup>40</sup></b>         | LM | India | Cohort (P) | CVD (I10) | 104 | - Inpatient / Residential naturopathy hospital<br>- Multidisciplinary team | Yoga-based exercise (postures, breathing, encourage to do aerobic exercises)                                                            | - Diet<br>- Rest / Relaxation<br>- Education (empowerment, personality development, stress management, meditation)      | Metro (L) |  |
| <b>El-Demerdash 2015<sup>41</sup></b> | LM | Egypt | Cohort (R) | CVD (I25) | 40  | - Outpatient cardiac rehabilitation unit<br>- HCP not reported             | Low-intensity exercise training                                                                                                         | - Risk factor modification<br>- Psychosocial management<br>- Nutritional counselling<br>- Physical activity counselling | Metro (L) |  |
| <b>El-Helow 2015<sup>42</sup></b>     | LM | Egypt | RCT        | CVD (I63) | 60  | - Inpatient stroke rehabilitation unit<br>- “Therapist”                    | Strengthening and range-of-motion exercises (as part of standard therapy) plus constrained movement and shaping (adapted task practice) | - Standard rehabilitation including posture, management of spasticity, standard occupational therapy                    | Metro (L) |  |
| <b>Elshazly 2018<sup>43</sup></b>     | LM | Egypt | Cohort (P) | CVD (I21) | 50  | - Outpatient cardiac rehabilitation unit at university hospital            | Moderate intensity treadmill training at 40–60% of heart rate reserve                                                                   | - Risk factor modification<br>- Psychosocial management<br>- Nutritional counselling<br>- Physical activity counselling | Metro (L) |  |

|                                        |     |       |                  |                   |     |                                                                                       |                                                                         |                                                                                                                                                        |           |                                                                                                                                               |
|----------------------------------------|-----|-------|------------------|-------------------|-----|---------------------------------------------------------------------------------------|-------------------------------------------------------------------------|--------------------------------------------------------------------------------------------------------------------------------------------------------|-----------|-----------------------------------------------------------------------------------------------------------------------------------------------|
|                                        |     |       |                  |                   |     | - Nurse and study team member                                                         |                                                                         |                                                                                                                                                        |           |                                                                                                                                               |
| <b>Embarak 2015<sup>44</sup></b>       | LM  | Egypt | Case/Control (P) | Respiratory (J44) | 95  | - Outpatient clinic of respiratory and rheumatology departments<br>- HCP not reported | Aerobic treadmill training plus resistance training exercises           | - An education course<br>- Instructed on how to perform muscle exercises and respiratory training daily at home for the entire duration of the program | Metro (M) |                                                                                                                                               |
| <b>Eraballi 2018<sup>45</sup></b>      | LM  | India | RCT              | CVD (I25)         | 300 | - Institute of Cardiac Sciences<br>- Yoga-therapist, nutritionist                     | - Breathing, physiotherapy exercises and yoga                           | - Pharmacotherapy<br>- Nutrition and lifestyle counselling<br>- Relaxation techniques                                                                  | Metro (L) |                                                                                                                                               |
| <b>Evans-Hudnall 2014<sup>46</sup></b> | HIC | USA   | RCT              | CVD (I63)         | 60  | - Large county hospital<br>- A health educator                                        | Physical activity goal setting                                          | - Workbook (stroke, risk factors, behavioural strategies, resources)<br>- Diet / Activity tracking forms<br>- Self-care education sessions             | Metro (L) | - Underserved ethnic minority individuals included.<br>- Linking with available community and national resources.                             |
| <b>Ghanem 2010<sup>47</sup></b>        | LM  | Egypt | RCT              | Respiratory (J44) | 39  | - Inpatient training (before discharge) at chest department and home-based component  | Respiratory muscle training, endurance training and resistance training | - Healthy lifestyle lectures with hand-outs including disease pathology, disease management, prevention of infections and nutrition.                   | Metro (M) | - A home-based rehabilitation program was assessed as “pulmonary rehabilitation is not yet widely utilized in many developing countries.” The |

|                                                                   |    |      |            |           |             |                                                                                                                         |                                          |                                  |           |                                                                                                                                                                                                                                                                                                                                           |
|-------------------------------------------------------------------|----|------|------------|-----------|-------------|-------------------------------------------------------------------------------------------------------------------------|------------------------------------------|----------------------------------|-----------|-------------------------------------------------------------------------------------------------------------------------------------------------------------------------------------------------------------------------------------------------------------------------------------------------------------------------------------------|
|                                                                   |    |      |            |           |             | - Unclear which HCP provided inpatient training                                                                         |                                          |                                  |           | home-based program under bi-weekly outpatient supervision can be considered a more viable and realistic paradigm in terms of manpower or finance, especially in low-income countries.<br><br>- The post-discharge program was based on an assessment phase which included availability of resources and patients' culture and traditions. |
| <b>Ghashghaei 2012<sup>48</sup> and Sadeghi 2012<sup>49</sup></b> | LM | Iran | Cohort (P) | CVD (I25) | 156 and 585 | - Cardiovascular research institute (outpatient)<br><br>- supervision of a physician, a nurse and exercise physiologist | Combined aerobic and resistance training | - Individual dietary instruction | Metro (L) |                                                                                                                                                                                                                                                                                                                                           |

|                                 |    |       |            |                   |     |                                                                                                                                                                               |                                                           |                                                                                                                                                                                            |           |                                                                                                                                                                                      |
|---------------------------------|----|-------|------------|-------------------|-----|-------------------------------------------------------------------------------------------------------------------------------------------------------------------------------|-----------------------------------------------------------|--------------------------------------------------------------------------------------------------------------------------------------------------------------------------------------------|-----------|--------------------------------------------------------------------------------------------------------------------------------------------------------------------------------------|
| <b>Gupta 2011<sup>50</sup></b>  | LM | India | Cohort (P) | CVD (I50)         | 123 | - Inpatient, group-based, hospital; transferred to local yoga centre for daily follow-up<br>- clinician, psychologist, Rajyoga meditation teacher, dietician, exercise expert | - Moderate aerobic exercise (brisk walk)                  | - Risk assessment<br>- Education on aetiology of heart disease, importance of healthy lifestyle.<br>- Diet modification                                                                    | Mixed     | - Spouses were invited to follow lifestyle program as well.<br>- Project team visited regional medical centres for follow-up assessments; the inaccessible were sent questionnaires. |
| <b>Hassan 2016<sup>51</sup></b> | LM | Egypt | RCT        | CVD (I25)         | 60  | - Outpatient physiotherapy department<br>- HCP not reported                                                                                                                   | Mild to moderate-intensity aerobic exercise               | - Risk factor (e.g. smoking) assessment<br>- "Patients were provided an idea about risk factor control and secondary prevention according to AHA guidelines for secondary prevention 2011" | Metro (L) |                                                                                                                                                                                      |
| <b>Hassan 2016<sup>52</sup></b> | LM | Egypt | Cohort (P) | Respiratory (J44) | 40  | - Outpatient department<br>- HCP not reported                                                                                                                                 | Interval resistance training for lower extremity muscles. | - Education on disease self-management (prevention and                                                                                                                                     | Metro (L) | - Patients were allocated to specific groups based on the number of comorbidities                                                                                                    |

|                                     |    |           |     |                   |    |                                                                                       |                                                                                                                                                      |                                                                                          |           |                                                                                                                                                                                 |
|-------------------------------------|----|-----------|-----|-------------------|----|---------------------------------------------------------------------------------------|------------------------------------------------------------------------------------------------------------------------------------------------------|------------------------------------------------------------------------------------------|-----------|---------------------------------------------------------------------------------------------------------------------------------------------------------------------------------|
|                                     |    |           |     |                   |    |                                                                                       |                                                                                                                                                      | early treatment of exacerbations, breathing strategies and bronchial hygiene techniques) |           | (unclear how that affected the intervention).                                                                                                                                   |
| <b>Jayasheela 2017<sup>23</sup></b> | LM | India     | RCT | Respiratory (J44) | 30 | - Inpatient, rural hospital<br>- HCP not reported                                     | Yoga-based exercise and breathing exercises                                                                                                          | - Education on smoking cessation and lifestyle modification                              | Town (S)  | - Nurse-delivered, community-based intervention through rural hospital.<br><br>- Literacy, cultural background and socio-economic profile included in sample description.       |
| <b>Jayasuriya 2015<sup>53</sup></b> | LM | Sri Lanka | RCT | Diabetes (E11)    | 85 | - Community-based, primary care clinic / teaching hospital<br>- Trained nursing staff | Physical activity intervention targeted to increase culturally appropriate exercise during household work (for women) and to introduce brisk walking | - Goal-setting<br>- Pedometer<br>- Diet intervention                                     | Metro (L) | - Model designed specifically to the Sri Lanka health care system.<br><br>- Training of nursing staff<br><br>- Culturally appropriate exercise (household work, brisk walking). |
| <b>Jyotsna 2013<sup>54</sup></b>    | LM | India     | RCT | Diabetes (E11)    | 64 | - Outpatient clinic at Institute for Medical Sciences<br>- “Certified teacher”        | Comprehensive yoga-based movements and breathing program                                                                                             | - Dietary advice<br>- Brisk walking for 45 minutes daily                                 | Metro (L) | - To increase compliance, only patients from nearby were selected.                                                                                                              |

|                                                                                            |     |           |                  |                |     |                                                                                |                                                     |                                                                                                                                                         |           |                                                                                                                                                         |
|--------------------------------------------------------------------------------------------|-----|-----------|------------------|----------------|-----|--------------------------------------------------------------------------------|-----------------------------------------------------|---------------------------------------------------------------------------------------------------------------------------------------------------------|-----------|---------------------------------------------------------------------------------------------------------------------------------------------------------|
|                                                                                            |     |           |                  |                |     |                                                                                |                                                     |                                                                                                                                                         |           | - A relative signed off the activity diary on a weekly basis.                                                                                           |
| <b>Karimi 2017<sup>55</sup></b><br><b>and</b><br><b>Shakil-Ur-Rehman 2017<sup>56</sup></b> | LM  | Pakistan  | RCT              | Diabetes (E11) | 102 | - Outpatient; Rehabilitation and Research Centre<br>- HCP not reported         | Aerobic exercise training                           | - Dietary plan                                                                                                                                          | Metro (L) |                                                                                                                                                         |
| <b>Ko 2011<sup>57</sup></b>                                                                | HIC | S. Korea  | Cohort (P)       | Diabetes (E11) | 96  | - Home-based<br>- Visiting, registered nurses with >10yrs experience           | Individual education in exercise with trained nurse | - Knowledge assessment<br>- Education (disease management)<br>- Education (lifestyle factors)<br>- Education (foot care)<br>- Education (complications) | Metro (M) | - Low-income participants were defined according to the criteria of the 2006 Ordinance of the Ministry for Health, Welfare and Family Affairs of Korea. |
| <b>Maharaj 2016<sup>58</sup></b>                                                           | LM  | Nigeria   | RCT              | Diabetes (E11) | 90  | - Rural outreach program / gymnasium<br>- Dietician, rehabilitation specialist | Rebound (trampoline) exercise                       | - Dietary counselling                                                                                                                                   | Rural     | - Part of outreach program                                                                                                                              |
| <b>Masrul 2016<sup>59</sup></b>                                                            | LM  | Indonesia | Case/Control (P) | Diabetes (E11) | 110 | - Consultation at diabetes clinic + Home-based<br>- HCP not reported           | Exercise consultation                               | - Diet consultation                                                                                                                                     | Metro (L) |                                                                                                                                                         |

|                                      |     |       |     |                |     |                                                                                                                          |                                                                                                                     |                                                                                                                                                                                                                                                       |           |                                                                                                                                                                                                                                                                                                                                                                                                                                                                                   |
|--------------------------------------|-----|-------|-----|----------------|-----|--------------------------------------------------------------------------------------------------------------------------|---------------------------------------------------------------------------------------------------------------------|-------------------------------------------------------------------------------------------------------------------------------------------------------------------------------------------------------------------------------------------------------|-----------|-----------------------------------------------------------------------------------------------------------------------------------------------------------------------------------------------------------------------------------------------------------------------------------------------------------------------------------------------------------------------------------------------------------------------------------------------------------------------------------|
| <b>Mayer-Davis 2004<sup>60</sup></b> | HIC | USA   | RCT | Diabetes (E11) | 187 | <ul style="list-style-type: none"> <li>- Primary health care centres</li> <li>- Nutritionists</li> </ul>                 | Behavioural strategies for weight loss and physical activity, such as self-monitoring of diet and physical activity | <ul style="list-style-type: none"> <li>- Additional behavioural strategies to assist with achieving weight loss goals</li> </ul>                                                                                                                      | Rural     | <ul style="list-style-type: none"> <li>- Medically underserved rural communities.</li> <li>- Modified program including regular use of group sessions, considerable simplification and reduction in the amount of written materials, encouragement of physical activity at low to moderate intensity for individuals who had very sedentary lifestyles, and inclusion of additional regionally /culturally appropriate examples and suggestions for physical activity.</li> </ul> |
| <b>Mehani 2013<sup>61</sup></b>      | LM  | Egypt | RCT | CVD (I50)      | 40  | <ul style="list-style-type: none"> <li>- Outpatient physical therapy department</li> <li>- Physical therapist</li> </ul> | Circuit-interval aerobic training                                                                                   | <ul style="list-style-type: none"> <li>- Simple disease information sessions aimed to reinforce patient education about chronic heart failure signs and symptoms, ensure compliance with medications, identify recurrent symptoms amenable</li> </ul> | Metro (L) |                                                                                                                                                                                                                                                                                                                                                                                                                                                                                   |

|                                                              |     |       |            |                |     |                                                                                            |                                                                                       |                                                                                                                                                                                       |           |                                                                                                                                       |
|--------------------------------------------------------------|-----|-------|------------|----------------|-----|--------------------------------------------------------------------------------------------|---------------------------------------------------------------------------------------|---------------------------------------------------------------------------------------------------------------------------------------------------------------------------------------|-----------|---------------------------------------------------------------------------------------------------------------------------------------|
|                                                              |     |       |            |                |     |                                                                                            |                                                                                       | to treatment, advice on how to live with heart failure and special emphasis was given to dietary counselling.                                                                         |           |                                                                                                                                       |
| <b>Mohammed 2018<sup>62</sup></b>                            | LM  | Egypt | Cohort (P) | CVD (I50)      | 80  | - Department of Cardiology, university hospital<br>- HCP not reported                      | Individualized, aerobic, treadmill training                                           | - Risk factor assessment<br>- Physical activity counselling                                                                                                                           | Metro (L) |                                                                                                                                       |
| <b>Moncrieft 2016<sup>63</sup></b>                           | HIC | USA   | RCT        | Diabetes (E11) | 111 | - Community health clinic<br>- Therapist                                                   | Physical activity goal; brisk walking or aerobic activity up to 150 min / week        | - Goal setting (diet / weight loss)<br>- Multi-component education sessions (physical activity, weight loss, stress, nutrition, goals)                                                | Metro (L) | - Low-income minority patients                                                                                                        |
| <b>Najafi 2015<sup>64</sup> and Nalini 2014<sup>65</sup></b> | LM  | Iran  | Cohort (R) | CVD (I25)      | 887 | - Inpatient hospital + outpatient cardiac rehabilitation clinic<br>- “Rehabilitation team” | Inpatient exercise training followed by outpatient program (hospital-based or hybrid) | - Education (preliminary phase)<br>- Nutritional and psychological assessment<br>- Education meetings (complementary phase) focused on controlling risk factors, healthy diet, weight | Metro (M) | - A hybrid program was offered to take into consideration socioeconomic status, level of education and access to health care service. |

|                                    |     |       |            |                   |     |                                                                                    |                                                                                 |                                                                                                                                                       |           |                                                                                                      |
|------------------------------------|-----|-------|------------|-------------------|-----|------------------------------------------------------------------------------------|---------------------------------------------------------------------------------|-------------------------------------------------------------------------------------------------------------------------------------------------------|-----------|------------------------------------------------------------------------------------------------------|
|                                    |     |       |            |                   |     |                                                                                    |                                                                                 | control and stress management.<br>- Relaxation techniques                                                                                             |           |                                                                                                      |
| <b>Naser 2008</b> <sup>66</sup>    | LM  | Iran  | RCT        | CVD (I25)         | 100 | - Outpatient clinic consultations + home-based<br>- Program manager                | Aerobic exercise                                                                | - Manual to help home-based exercise, dietary modifications and nutrition facts.<br>- Risk factor assessment and individualized lifestyle counselling | Metro (L) |                                                                                                      |
| <b>Pande 2005</b> <sup>67</sup>    | LIC | India | Cohort (P) | Respiratory (J44) | 24  | - Home-based program<br>- HCP not reported                                         | Leg exercises, and respiratory muscle training / breathing exercises            | - Education (causes, manifestations, and management)<br>- Nutritional support<br>- Psychosocial support                                               | Metro (L) |                                                                                                      |
| <b>Raghuram 2014</b> <sup>68</sup> | LM  | India | RCT        | CVD (I25)         | 250 | - Division of yoga and life sciences<br>- Intensive care nurse, and yoga therapist | Yoga-based movement and breathing exercises<br>OR physiotherapy-based exercises | - Counselling on lifestyle modification included the concepts of right living from Indian yoga psychology                                             | Metro (L) | - Patients were included living within <200 km from study centre to ensure compliance for follow up. |
| <b>Ramirez 2017</b> <sup>69</sup>  | HIC | USA   | RCT        | Diabetes (E11)    | 42  | - Ambulatory care clinic                                                           | - Participants received an activity monitor,                                    | - Behaviour change education                                                                                                                          | Metro (L) | - Low-income, Latino patients were included from a safety-net ambulatory clinic.                     |

|                                    |     |       |            |                   |    |                                                                                                    |                                                                                                    |                                                                                    |           |                                                                                                         |
|------------------------------------|-----|-------|------------|-------------------|----|----------------------------------------------------------------------------------------------------|----------------------------------------------------------------------------------------------------|------------------------------------------------------------------------------------|-----------|---------------------------------------------------------------------------------------------------------|
|                                    |     |       |            |                   |    | - Short-message or voice message service directed by research assistant                            | targeted step goals and tailored feedback                                                          |                                                                                    |           | - A family member / friend was invited to participate.<br>- Service offered in Spanish.                 |
| <b>Ranjita 2016</b> <sup>70</sup>  | LM  | India | RCT        | Respiratory (J44) | 81 | - Outpatient clinic<br>- Yoga instructors                                                          | Yoga-based exercises                                                                               | - Lifestyle counselling and lectures (e.g. health, lifestyle modification, stress) | Metro (L) | - A specific working population was sampled (coal miners).                                              |
| <b>Rifaat 2014</b> <sup>71</sup>   | LM  | Egypt | Cohort (P) | Respiratory (J84) | 30 | - Rheumatology and rehabilitation outpatient department; university hospital<br>- HCP not reported | Upper and lower extremity exercises, breathing exercise, and chest physical therapy                | - "Psychological support and patient education rounded out the program"            | Metro (S) |                                                                                                         |
| <b>Shagufta 2011</b> <sup>72</sup> | LM  | India | RCT        | CVD (I51)         | 30 | - Physiotherapy outpatient department or home-based<br>- Researcher, dietician                     | Supervised OR home-based exercises sessions including range of motion, walking, and stair climbing | - Education and counselling<br>- Nutritional advice                                | Metro (L) |                                                                                                         |
| <b>Shah 2015</b> <sup>73</sup>     | HIC | USA   | Cohort (P) | Diabetes (E11)    | 60 | - Home-based / Telemedicine<br>- Three community members aged 37–45                                | Individual education home-visit on exercise / physical activity (150 min / week)                   | - Monthly home-based educational interventions to encourage healthy lifestyles,    | Mixed     | - Underserved, minority populations (Zuni Indians).<br>- Home visits to complete baseline measurements. |

|                                    |     |       |                    |                   |    |                                                                                                        |                                                  |                                                                                                    |           |                                                                                                                                                                                                                                                                                                                    |
|------------------------------------|-----|-------|--------------------|-------------------|----|--------------------------------------------------------------------------------------------------------|--------------------------------------------------|----------------------------------------------------------------------------------------------------|-----------|--------------------------------------------------------------------------------------------------------------------------------------------------------------------------------------------------------------------------------------------------------------------------------------------------------------------|
|                                    |     |       |                    |                   |    | with a background in health-related work were recruited, trained and certified as lay interventionists |                                                  | including diet, and alcohol and cigarette avoidance                                                |           | - Community health workers were trained as lay-interventionists.                                                                                                                                                                                                                                                   |
| <b>Sindhwani 2011<sup>74</sup></b> | LM  | India | Case / Control (P) | Respiratory (J44) | 20 | - Home-based with regular follow-ups<br>- Dietician, respiratory physiotherapist, psychologist         | Respiratory muscle training                      | - Dietary instructions<br>- Mental health counselling                                              | Town (S)  | - Difficult to deliver conventional pulmonary rehabilitation programs in resource-limited settings.                                                                                                                                                                                                                |
| <b>Singh 2003<sup>75</sup></b>     | LIC | India | RCT                | Respiratory (J44) | 40 | - Home-based with weekly outpatient follow-ups<br>- HCP not reported                                   | Lower extremity exercise and breathing exercises | - Secretion removal<br>- Energy conservation and work simplification of activities of daily living | Metro (L) | - A home-based program was offered with walking as primary mode of exercise.<br>- Home-based rehabilitation was chosen as it is more convenient in the context of the adverse situations found in India when implementing rehabilitation programs (Illiteracy, ignorance, poverty, lack of motivation, inclination |

|                                       |    |           |            |                         |     |                                                                                                           |                                                   |                                                                                                                                                                                             |           |                                                                                                                                                             |
|---------------------------------------|----|-----------|------------|-------------------------|-----|-----------------------------------------------------------------------------------------------------------|---------------------------------------------------|---------------------------------------------------------------------------------------------------------------------------------------------------------------------------------------------|-----------|-------------------------------------------------------------------------------------------------------------------------------------------------------------|
|                                       |    |           |            |                         |     |                                                                                                           |                                                   |                                                                                                                                                                                             |           | towards drug therapy, and smoking as a social custom).                                                                                                      |
| <b>Suseelal 2016</b> <sup>76</sup>    | LM | India     | RCT        | Diabetes (E10<br>- E11) | 400 | - Community-based<br>- Researcher                                                                         | Muscle strengthening and stretching exercises     | - Educational booklet including information on blood sugar, glucose monitoring, meal plans, stretching exercises, medication, insulin injection, and foot care<br>- Nutritional counselling | Rural     | - "Cultural background of the patients was respected".<br>- Randomization at the level of rural village.                                                    |
| <b>Toufan 2009</b> <sup>77</sup>      | LM | Iran      | Cohort (P) | CVD (I51)               | 65  | - Outpatient cardiac rehabilitation centre<br>- Psychologist; unclear who provided the exercise component | Aerobic training                                  | - Health education counselling<br>- Psychotherapy<br>- Stress management<br>- Smoking cessation<br>- Relaxation training                                                                    | Metro (L) |                                                                                                                                                             |
| <b>Van Rooijen 2004</b> <sup>78</sup> | LM | S. Africa | RCT        | Diabetes (E11)          | 158 | - Community hospital; home-based program<br>-                                                             | Incremental daily home exercise (walking) program | - Education (exercise)<br>- Education (disease management)<br>- Education (nutrition)                                                                                                       | Metro (M) | - Home-based program was chosen due to the participants' home responsibilities, as well as to ensure a safe environment for this women-only patient sample. |

|                                  |     |          |     |                |     |                                                                                                                                       |                                                                                   |                                                                                                                                                                                                        |           |                                                                                                                                                                                                                                     |
|----------------------------------|-----|----------|-----|----------------|-----|---------------------------------------------------------------------------------------------------------------------------------------|-----------------------------------------------------------------------------------|--------------------------------------------------------------------------------------------------------------------------------------------------------------------------------------------------------|-----------|-------------------------------------------------------------------------------------------------------------------------------------------------------------------------------------------------------------------------------------|
|                                  |     |          |     |                |     |                                                                                                                                       |                                                                                   |                                                                                                                                                                                                        |           | <ul style="list-style-type: none"> <li>- Participants were encouraged to form small groups.</li> <li>- Common activities were visualized in the activity log.</li> </ul>                                                            |
| <b>Wang 2018<sup>79</sup></b>    | HIC | USA      | RCT | Diabetes (E11) | 26  | <ul style="list-style-type: none"> <li>- Underserved minority community health centre</li> <li>- Lifestyle counsellors</li> </ul>     | - Pedometer based activity plan                                                   | - Education on healthy eating, physical activity, stress and behaviour change.                                                                                                                         | Metro (L) | <ul style="list-style-type: none"> <li>- Patients from underserved minority community health centre who are uninsured / underinsured.</li> <li>- Three different delivery models (mobile, paper/pen, usual) were tested.</li> </ul> |
| <b>Wattana 2007<sup>80</sup></b> | LM  | Thailand | RCT | Diabetes (E11) | 147 | <ul style="list-style-type: none"> <li>- Community-based hospital in rural Thailand; part home-based</li> <li>- Researcher</li> </ul> | - Education on appropriate physical activity                                      | <ul style="list-style-type: none"> <li>- Education on meal planning, foot care, use of medicine, complications and stress reduction</li> <li>- Education manual "Living well with diabetes"</li> </ul> | Rural     | - Rural, community centre.                                                                                                                                                                                                          |
| <b>Wayne 2015<sup>81</sup></b>   | HIC | Canada   | RCT | Diabetes (E11) | 138 | - Community Health Centre                                                                                                             | Supervised exercise education program including exercise prescription, monitoring | - Health-related goal setting including food, blood glucose, exercise and mood. Secure                                                                                                                 | Metro (L) | - People living in lower socioeconomic status communities were included.                                                                                                                                                            |

|                                    |    |           |     |                   |     |                                                                                       |                                                                                                                 |                                                                                                                                                                      |           |                                                                                                                                                                           |
|------------------------------------|----|-----------|-----|-------------------|-----|---------------------------------------------------------------------------------------|-----------------------------------------------------------------------------------------------------------------|----------------------------------------------------------------------------------------------------------------------------------------------------------------------|-----------|---------------------------------------------------------------------------------------------------------------------------------------------------------------------------|
|                                    |    |           |     |                   |     | - eHealth counselling through certified exercise physiologists                        | and adherence support. Experimental group received additional mobile wellness platform                          | messaging with health counsellor.                                                                                                                                    |           | - Smartphones were provided by the research team including data plan.                                                                                                     |
| <b>Wiyono 2006</b> <sup>82</sup>   | LM | Indonesia | RCT | Respiratory (J44) | 56  | - Asthma clinic<br>- HCP not reported                                                 | Stationary cycling exercise program                                                                             | - Education<br>- Chest physiotherapy                                                                                                                                 | Metro (L) |                                                                                                                                                                           |
| <b>Yadav 2015</b> <sup>83</sup>    | LM | India     | RCT | CVD (I25)         | 80  | - Yoga Lab of the Physiology Department<br>- Yoga instructor                          | Yoga-based exercises                                                                                            | - Lectures and group discussions aimed at understanding the need for lifestyle change, weight management and stress and anxiety management.<br>- Dietary counselling | Metro (L) | - Five-fold higher burden of coronary heart disease in urban India incurs greater economic burden.<br>- Only patients from the middle socio-economic class were included. |
| <b>Yadav 2016</b> <sup>84</sup>    | LM | India     | RCT | CVD (I63)         | 30  | - Outpatient Department of Physical Medicine and Rehabilitation<br>- HCP not reported | Modified constraint-induced movement therapy in conjunction with strengthening exercises and endurance training | - ADL training<br>- Stretching and Range of Motion exercises<br>- Gait training and/or orthosis<br>- Education                                                       | Metro (L) | - Literacy and income status included as descriptive variable.                                                                                                            |
| <b>Yogendra 2004</b> <sup>85</sup> | LM | India     | RCT | CVD (I25)         | 113 | - Yoga institute                                                                      | Individualized aerobic walking exercise                                                                         | - Diet modification (low fat, low cholesterol)                                                                                                                       | Metro (L) |                                                                                                                                                                           |

|                                 |    |       |     |           |    |                                                                                                                                                                                           |                                                                                                            |                                                                                                                                          |           |                                                                                                                                                                                                                                                                                                |
|---------------------------------|----|-------|-----|-----------|----|-------------------------------------------------------------------------------------------------------------------------------------------------------------------------------------------|------------------------------------------------------------------------------------------------------------|------------------------------------------------------------------------------------------------------------------------------------------|-----------|------------------------------------------------------------------------------------------------------------------------------------------------------------------------------------------------------------------------------------------------------------------------------------------------|
|                                 |    |       |     |           |    | - Cardiologist /<br>Nutritionist provided<br>supervised sessions.<br>Intervention was<br>family-based.                                                                                    |                                                                                                            | - Lifestyle modification<br>including sleep, recreation,<br>relationships, faith, positive<br>attitudes and correct attitude<br>to work. |           |                                                                                                                                                                                                                                                                                                |
| <b>Zhang 2017</b> <sup>86</sup> | UM | China | RCT | CVD (I21) | 62 | - Community<br>health service centre<br><br>- Multidisciplinary<br>research team<br>comprising of<br>dietitian,<br>psychologist,<br>physiotherapist,<br>cardiologist and<br>nursing staff | Aerobic training<br>plan according to their<br>preferred training<br>modality in their home<br>environment | - Risk assessment<br><br>- Counselling (diet, smoking)<br><br>- Group discussion                                                         | Metro (L) | - “In the context of limited<br>health funding and associated<br>scarcity of medical resources,<br>it seems difficult to provide<br>consistent care to coronary<br>heart disease patients<br>depending solely on<br>hospitals.”<br><br>- Randomization at the<br>“participating centre” level. |

*\*As classified at the time of participant recruitment; <sup>†</sup>Geographical context was classified in line with the United States of America’s Department of Agriculture as Metro (Large [L]) > 1 million, Metro (Medium [M]) 250.000 – 1 million, Metro (Small [S]) < 250.000, Town (L) > 20.000 (not in metro area)), Town (M) 2500 – 20000, Town (S) 2500 – 20.000 (adjacent to metro), Rural < 20.000 (not adjacent to metro); Abbreviations: CVD, Cardiovascular Disease; R, Retrospective; P, Prospective; LIC, Low-Income Country; LMIC, Lower-Middle Income Country; UM, Upper-Middle Income Country; HIC, High-Income Country; LRS, Low-Resource Setting; ICD, International Classification of Disease<sup>24</sup>*
