# Supplementary material for: Exercise-based rehabilitation for major non-communicable diseases in low-resource settings: a scoping review
Source: PubMed Central journal article supplement — BMJ Glob Health. 2019 Nov 7;4(6):e001833. doi: 10.1136/bmjgh-2019-001833 (PMC6861093; doi:10.1136/bmjgh-2019-001833), 2019-11-07
Supplement: bmjgh-2019-001833supp003.pdf [file bmjgh-2019-001833supp003.pdf]

## Supplementary file 3: Extracted outcomes

| Body Function                        |    | Activity and Participation                                  |    | Personal                                           |   | Environmental                                            |   | Other                                    |   |
|--------------------------------------|----|-------------------------------------------------------------|----|----------------------------------------------------|---|----------------------------------------------------------|---|------------------------------------------|---|
| Outcome                              | n  | Outcome                                                     | n  | Outcome                                            | n | Outcome                                                  | n | Outcome                                  | n |
| Body Mass Index (kg/m <sup>2</sup> ) | 19 | 6 Minute Walk Test (m)                                      | 20 | BORG (Dyspnoea)                                    | 4 | Passive Smokers                                          | 1 | Yoga score                               | 1 |
| Systolic Blood Pressure              | 17 | 36-Item Short Form Health Survey (Mental Composite Score)   | 5  | Smoking (%)                                        | 3 | Perceived social support from family members and friends | 1 | Fruit / vegetable consumption (servings) | 1 |
| Diastolic Blood Pressure (mmHg)      | 15 | 36-Item Short Form Health Survey (Physical Composite Score) | 4  | Rating of Perceived Exertion (modified borg scale) | 2 |                                                          |   | Completion                               | 1 |
| HbA1c (%)                            | 15 | 36-Item Short Form Health Survey - General Health           | 4  | BORG (Fatigue)                                     | 2 |                                                          |   | Participation                            | 1 |
| LDL (mg/dl)                          | 13 | 36-Item Short Form Health Survey - Physical Functioning     | 4  | Breathlessness (VAS)                               | 2 |                                                          |   | Participation - men                      | 1 |
| HDL (mg/dl)                          | 12 | St George Respiratory Questionnaire - Total score           | 4  | Diet (total energy)(kcal)                          | 2 |                                                          |   | Participation - men out of town          | 1 |
| Triglycerides (mg/dl)                | 11 | Chronic respiratory disease questionnaire - dyspnoea        | 3  | Carbohydrate intake (g)                            | 1 |                                                          |   | Participation - women                    | 1 |
| Resting Heart Rate                   | 10 | Chronic respiratory disease questionnaire - emotion         | 3  | Current smoker                                     | 1 |                                                          |   | Participation - women out of town        | 1 |
| Total cholesterol (mg/dl)            | 10 | Chronic respiratory disease questionnaire - fatigue         | 3  | Diet - Caloric intake                              | 1 |                                                          |   | Referral                                 | 1 |
| Weight (kg)                          | 10 | New York Heart Association functional class                 | 3  | Diet - Complex carbohydrate content                | 1 |                                                          |   | Referral - Men                           | 1 |
| Fasting blood glucose                | 7  | 36-Item Short Form Health Survey - Emotional Well-Being     | 3  | Diet - Total fat content                           | 1 |                                                          |   | Referral - men out of town               | 1 |
| FEV1 (%)                             | 7  | 36-Item Short Form Health Survey - Energy/Fatigue           | 3  | Fat Intake (g)                                     | 1 |                                                          |   | Referral - women                         | 1 |

|                                                      |   |                                                       |   |                              |   |                                        |   |
|------------------------------------------------------|---|-------------------------------------------------------|---|------------------------------|---|----------------------------------------|---|
| Metabolic Equivalent                                 | 6 | 36-Item Short Form Health Survey - Social Functioning | 3 | Perceived usefulness         | 1 | Referral - women out of town           | 1 |
| Ejection Fraction (%)                                | 5 | Chronic respiratory disease questionnaire - mastery   | 2 | Protein intake (g)           | 1 | Technical feasibility                  | 1 |
| FEV1 (L)                                             | 4 | Exercise tolerance time (min)                         | 2 | Satisfaction with Life scale | 1 | Retention and group session attendance | 1 |
| FVC (%)                                              | 4 | Modified Medical Research Council dyspnoea scale      | 2 | Sense of wellbeing score     | 1 | Coronary Heart Disease risk (%)        | 1 |
| FVC (L)                                              | 4 | 36-Item Short Form Health Survey - Role emotional     | 2 | Stress (PSS)                 | 1 | Hospitalization                        | 1 |
| Resting blood oxygen saturation (%)                  | 4 | 36-Item Short Form Health Survey - Role physical      | 2 |                              |   |                                        |   |
| VO2max (ml/kg/min)                                   | 4 | 36-Item Short Form Health Survey - Total              | 2 |                              |   |                                        |   |
| Waist Circumference (cm)                             | 4 | WHOQoL-Bref                                           | 3 |                              |   |                                        |   |
| HADS anxiety                                         | 3 | Action plan recall                                    | 1 |                              |   |                                        |   |
| HADS depression                                      | 3 | Action Research Arm Test                              | 1 |                              |   |                                        |   |
| Maximal HR                                           | 3 | Amount of Use Score (AOUS)                            | 1 |                              |   |                                        |   |
| 36-Item Short Form Health Survey - Pain              | 3 | CCQ Score                                             | 1 |                              |   |                                        |   |
| Waist to hip ratio                                   | 3 | Diabetes knowledge score                              | 1 |                              |   |                                        |   |
| Beck Depression Inventory-II                         | 2 | Diabetes Self-Efficacy scale                          | 1 |                              |   |                                        |   |
| FEV1 (ml)                                            | 2 | Diabetes self-management score                        | 1 |                              |   |                                        |   |
| FEV1 / FEV (%)                                       | 2 | Diet score                                            | 1 |                              |   |                                        |   |
| Heart rate (bpm)                                     | 2 | Duration of exercise (min / week)                     | 1 |                              |   |                                        |   |
| The Positive and Negative Affect Schedule - negative | 2 | Exercise (minutes)                                    | 1 |                              |   |                                        |   |
| The Positive and Negative Affect Schedule - positive | 2 | Exercise capacity (min)                               | 1 |                              |   |                                        |   |

|                                       |   |                                                                                            |   |  |  |
|---------------------------------------|---|--------------------------------------------------------------------------------------------|---|--|--|
| Peak Expiratory Flow Rate (PEFR)      | 2 | Exercise duration (seconds)                                                                | 1 |  |  |
| Very LDL                              | 2 | Exercise frequency (times/week)                                                            | 1 |  |  |
| Abdominal Circumference (cm)          | 1 | Fugl Meyer Assessment                                                                      | 2 |  |  |
|                                       |   | Kansas City Cardiomyopathy questionnaire - % change in clinical score (E/A ratio Grade1)   | 1 |  |  |
| Amplitude of MEPs (mV)                | 1 | Kansas City Cardiomyopathy questionnaire - % change in functional score (E/A ratio Grade1) | 1 |  |  |
| Anxiety (STAI)                        | 1 | Lifestyle change score                                                                     | 1 |  |  |
| Anxiety score                         | 1 | Medication adherence                                                                       | 1 |  |  |
| Average LVEF (%)                      | 1 | Minnesota Living with Heart Failure Questionnaire - Total score                            | 1 |  |  |
| Blood glucose (mg/dl)                 | 1 | Patient activation measure (PAM) Level                                                     | 1 |  |  |
| Body fat (%)                          | 1 | 1                                                                                          | 1 |  |  |
|                                       |   | Patient activation measure (PAM) Level                                                     | 1 |  |  |
| Body Surface Area (m2)                | 1 | 2                                                                                          | 1 |  |  |
|                                       |   | Patient activation measure (PAM) Level                                                     | 1 |  |  |
| Blood urea nitrogen (mg/dl)           | 1 | 3                                                                                          | 1 |  |  |
| Central Motor conduction time (m sec) | 1 | Patient activation measure (PAM) Level                                                     | 1 |  |  |
|                                       |   | 4                                                                                          | 1 |  |  |
| Chest press (1RM, kg)                 | 1 | Physical activity (steps/day)                                                              | 1 |  |  |
| Cholesterol (mg/dl)                   | 1 | Physical activity (walking MET)                                                            | 1 |  |  |
| Coronary lesions                      | 1 | Quality of Use Score (QOUS)                                                                | 1 |  |  |
| Coronary picture                      | 1 | Quality of Life (0 - 100)                                                                  | 1 |  |  |
| Covert anxiety scale                  | 1 | Return to work                                                                             | 1 |  |  |
|                                       |   | 36-Item Short Form Health Survey -                                                         |   |  |  |
| Creatinine (mg/dl)                    | 1 | Exercise                                                                                   | 1 |  |  |

|                                        |   |                                                        |   |  |  |
|----------------------------------------|---|--------------------------------------------------------|---|--|--|
| Cyclooxygenase-2                       | 1 | 36-Item Short Form Health Survey - Physical Limitation | 1 |  |  |
| Depression                             | 1 | Short Form Health Survey-12 - Mental composite         | 1 |  |  |
| Depression score                       | 1 | Short Form Health Survey-12 - Physical composite       | 1 |  |  |
| Diastolic Blood Pressure - Peak        | 1 | St George's Respiratory Questionnaire - Activity       | 1 |  |  |
| Diastolic Blood Pressure - Rest        | 1 | St George's Respiratory Questionnaire - Impact         | 1 |  |  |
| DLCO (ml/min/mmHg)                     | 1 | St George's Respiratory Questionnaire - Symptom        | 1 |  |  |
| DLCO(%)                                | 1 | Stretching frequently (yes)                            | 1 |  |  |
| Double product achieved                | 1 | Success rate                                           | 1 |  |  |
| eGFR (ml/min)                          | 1 | Treadmill Test (Metabolic Equivalents; Bruce protocol) | 1 |  |  |
| Glucose (mg/dl)                        | 1 | Veteran's Specific Activity Questionnaire              | 1 |  |  |
| Glycaemic control                      | 1 | Vigorous exercise (%)                                  | 1 |  |  |
| Haemoglobin (gm/dl)                    | 1 | Walking frequently (yes)                               | 1 |  |  |
| Heart rate recovery (bpm)              | 1 | Patient engagement and adherence to self-monitoring    | 1 |  |  |
| Heart rate recovery (bpm) - 1st minute | 1 |                                                        |   |  |  |
| Heart rate recovery (bpm) - 2nd minute | 1 |                                                        |   |  |  |
| Heart rate reserve                     | 1 |                                                        |   |  |  |
| IL-6                                   | 1 |                                                        |   |  |  |
| Insulin Resistance                     | 1 |                                                        |   |  |  |
| LDL/HDL                                | 1 |                                                        |   |  |  |
| MBP (mmHg)                             | 1 |                                                        |   |  |  |

|                                                                        |   |  |  |  |  |
|------------------------------------------------------------------------|---|--|--|--|--|
| State Anxiety                                                          | 1 |  |  |  |  |
| Trait anxiety                                                          | 1 |  |  |  |  |
| Type A behaviour score                                                 | 1 |  |  |  |  |
| Anger score                                                            | 1 |  |  |  |  |
| MMFR (%)                                                               | 1 |  |  |  |  |
| MVV (L/min)                                                            | 1 |  |  |  |  |
| Myocardial perfusion                                                   | 1 |  |  |  |  |
| No of nitrate tablets taken<br>per day                                 | 1 |  |  |  |  |
| Overt anxiety scale                                                    | 1 |  |  |  |  |
| PaCO2 (mmHg)                                                           | 1 |  |  |  |  |
| PaO2 (mmHg)                                                            | 1 |  |  |  |  |
| Participants equal or greater<br>than 5% weight loss                   | 1 |  |  |  |  |
| Peak Heart Rate (bpm)                                                  | 1 |  |  |  |  |
| Peak Power (Watts)                                                     | 1 |  |  |  |  |
| Percentage of body fat                                                 | 1 |  |  |  |  |
| Plasma insulin level                                                   | 1 |  |  |  |  |
| Platelet count                                                         | 1 |  |  |  |  |
| Post Prandial Blood Sugar                                              | 1 |  |  |  |  |
| Predicted VO2 (based on<br>Duke Activity Questionnaire)                | 1 |  |  |  |  |
| Predicted VO2 (based on<br>Veteran Specific Activity<br>Questionnaire) | 1 |  |  |  |  |
| Quadriceps strength (1RM,<br>kg)                                       | 1 |  |  |  |  |
| Respiratory Rate (cycles /<br>min)                                     | 1 |  |  |  |  |

|                                                |   |  |  |  |  |
|------------------------------------------------|---|--|--|--|--|
| Resting Motor threshold (% of output)          | 1 |  |  |  |  |
| Serum Creatine (mg/dl)                         | 2 |  |  |  |  |
| SVC (L)                                        | 1 |  |  |  |  |
| Systolic Blood Pressure - Peak                 | 1 |  |  |  |  |
| TC / HDL                                       | 1 |  |  |  |  |
| Total cholesterol (mg/dl) <200                 | 1 |  |  |  |  |
| Total cholesterol (mg/dl) <200-239             | 1 |  |  |  |  |
| Total cholesterol (mg/dl)>240                  | 1 |  |  |  |  |
| Urine Albumin-to-Creatinine Ratio (mg ALB/gCR) | 1 |  |  |  |  |
| Uric acid (mg/dl)                              | 1 |  |  |  |  |
| Waist Circumference (inches)                   | 1 |  |  |  |  |
| Weight (% change)                              | 1 |  |  |  |  |
| White blood cells (x10 <sup>9</sup> /L)        | 1 |  |  |  |  |

IL – interleukin; LDL - Low density lipoprotein; HDL - High density lipoprotein; MMFR - Maximal mid-expiratory flow rate; MVV - Maximal voluntary ventilation; VAS - Visual Analogue Scale; FEV1 - Forced Expiratory Volume in one second; FVC - Forced Vital Capacity FEV - Forced Expiratory Volume; DLCO - Diffusing capacity of the lungs for carbon monoxide; SVC – Slow Vital Capacity; TC - Total Cholesterol; HADS - Hospital anxiety and depression scale; PaCO<sub>2</sub> - Partial pressure of Carbon dioxide; PaO<sub>2</sub> - Partial pressure of Oxygen; VO<sub>2</sub> - Maximal oxygen uptake; RM - Repetition maximum; CCQ - Clinical COPD Questionnaire; PSS - Perceived Stress Scale; ALB - Albumin
