# Supplementary material for: Exercise-based rehabilitation for major non-communicable diseases in low-resource settings: a scoping review
Source: PubMed Central journal article supplement — BMJ Glob Health. 2019 Nov 7;4(6):e001833. doi: 10.1136/bmjgh-2019-001833 (PMC6861093; doi:10.1136/bmjgh-2019-001833), 2019-11-07
Supplement: bmjgh-2019-001833supp004.pdf [file bmjgh-2019-001833supp004.pdf]

## Supplementary file 4: Risk of bias assessment per study (RCTs)

|                    | Sequence generation | Allocation concealment | Blinding of Outcome assessor | Blinding of Participants & Personnel | Incomplete data | Selective reporting | Other |
|--------------------|---------------------|------------------------|------------------------------|--------------------------------------|-----------------|---------------------|-------|
| Abdelhalem 2018    | 2                   | 2                      | 2                            | 2                                    | 1               | 1                   | 1     |
| Ajiboye 2015       | 1                   | 1                      | 3                            | 2                                    | 2               | 3                   | 1     |
| Babu 2011          | 1                   | 2                      | 3                            | 1                                    | 3               | 3                   | 1     |
| Basri 2017         | 2                   | 1                      | 1                            | 2                                    | 1               | 2                   | 2     |
| Chi-Jane 2012      | 2                   | 2                      | 2                            | 1                                    | 1               | 1                   | 1     |
| Daabis 2017        | 2                   | 3                      | 1                            | 3                                    | 1               | 1                   | 2     |
| Dehdari 2009       | 2                   | 3                      | 3                            | 2                                    | 3               | 1                   | 3     |
| El-Helow 2015      | 1                   | 1                      | 3                            | 1                                    | 2               | 1                   | 1     |
| Eraballi 2018      | 1                   | 1                      | 1                            | 2                                    | 3               | 1                   | 1     |
| Evans-Hudnall 2014 | 1                   | 1                      | 3                            | 3                                    | 1               | 3                   | 1     |
| Ghanem 2010        | 2                   | 3                      | 3                            | 3                                    | 3               | 1                   | 2     |
| Hassan 2016        | 2                   | 2                      | 3                            | 3                                    | 3               | 3                   | 2     |
| Jayasheela 2017    | 3                   | 3                      | 3                            | 3                                    | 3               | 2                   | 3     |
| Jayasuriya 2015    | 1                   | 2                      | 3                            | 1                                    | 3               | 1                   | 1     |
| Jyotsna 2013       | 2                   | 2                      | 3                            | 1                                    | 3               | 3                   | 1     |
| Karimi 2017        | 2                   | 1                      | 3                            | 3                                    | 3               | 3                   | 2     |
| Maharaj 2016       | 2                   | 2                      | 3                            | 2                                    | 3               | 3                   | 2     |
| Mayer-Davis 2004   | 2                   | 2                      | 2                            | 1                                    | 1               | 1                   | 2     |
| Mehani 2013        | 3                   | 2                      | 2                            | 1                                    | 1               | 1                   | 3     |
| Moncrieft 2016     | 1                   | 1                      | 2                            | 3                                    | 1               | 1                   | 1     |
| Najafi 2015        | 2                   | 2                      | 2                            | 1                                    | 1               | 1                   | 2     |
| Naser 2008         | 2                   | 2                      | 2                            | 1                                    | 1               | 1                   | 1     |
| Raghuram 2014      | 2                   | 1                      | 3                            | 1                                    | 1               | 1                   | 1     |
| Ramirez 2017       | 1                   | 1                      | 3                            | 2                                    | 1               | 1                   | 2     |
| Ranjita 2016       | 2                   | 1                      | 3                            | 1                                    | 1               | 1                   | 2     |
| Shagufta 2011      | 2                   | 2                      | 1                            | 1                                    | 1               | 1                   | 2     |
| Singh 2003         | 2                   | 2                      | 2                            | 1                                    | 1               | 1                   | 2     |
| Suseelal 2016      | 2                   | 2                      | 2                            | 1                                    | 1               | 1                   | 2     |
| vanRooijen 2004    | 1                   | 1                      | 1                            | 1                                    | 1               | 1                   | 1     |
| Wang 2018          | 2                   | 1                      | 2                            | 3                                    | 1               | 1                   | 1     |
| Wattana 2007       | 2                   | 2                      | 2                            | 3                                    | 1               | 1                   | 2     |
| Wayne 2015         | 1                   | 1                      | 2                            | 2                                    | 1               | 1                   | 1     |
| Wiyono 2006        | 2                   | 3                      | 3                            | 1                                    | 3               | 3                   | 2     |
| Yadav 2015         | 1                   | 1                      | 1                            | 1                                    | 1               | 1                   | 1     |
| Yadav 2016         | 2                   | 2                      | 2                            | 1                                    | 1               | 1                   | 1     |
| Zhang 2017         | 2                   | 1                      | 2                            | 1                                    | 1               | 1                   | 2     |

*Supplement 4: Individual risk of bias scores for included RCTs. Low risk (1), Unclear Risk (2) or High Risk of Bias (3)*
